# Supplementary material for: Analysis of whole genome-transcriptomic organization in brain to identify genes associated with alcoholism
Source: PubMed Central journal article supplement (PMC6376002; doi:10.1038/s41398-019-0384-y), 2019-02-14
Supplement: 41398_2019_384_MOESM3_ESM.pdf [file 41398_2019_384_MOESM3_ESM.pdf]

Supp table 2a: Differentially expressed hub genes of Thistle2 module in brain of AD subjects

| id              | gene     | log2FoldChange | lfcSE | pvalue   | Mouse/ Rat brain (Diff expression P) | Region           | Ethanol/ Treatment       | Refernce                        |
|-----------------|----------|----------------|-------|----------|--------------------------------------|------------------|--------------------------|---------------------------------|
| ENSG00000171189 | GRIK1    | -0.16          | 0.04  | 1.59E-04 | 3.00E-02                             | Frontal-cortex   | AP vs nAP                | Ferguson et al, 2017            |
| ENSG00000189056 | RELN     | -0.20          | 0.06  | 5.04E-04 | 6.80E-03                             | whole brain      | AP vs nAP                | Kimpel et al, 2007              |
| ENSG00000231764 | DLX6-AS1 | -0.18          | 0.06  | 1.18E-03 |                                      |                  |                          |                                 |
| ENSG00000146469 | VIP      | -0.16          | 0.06  | 4.16E-03 | 9.00E-04                             | Whole brain      | AP vs nAP                | Mulligan et al, 2006            |
| ENSG00000157404 | KIT      | -0.14          | 0.05  | 5.77E-03 | 4.00E-02                             | Central Amygdala | AP vs nAP                | Ferguson et al, 2017            |
| ENSG0000017427  | IGF1     | -0.12          | 0.05  | 1.91E-02 |                                      |                  |                          |                                 |
| ENSG00000135824 | RGS8     | -0.13          | 0.06  | 2.31E-02 |                                      |                  |                          |                                 |
| ENSG00000172137 | CALB2    | -0.12          | 0.06  | 3.54E-02 | 1.90E-02                             | Frontal cortex   | DID Drinking             | Osterndorff-Kahanek et al, 2013 |
| ENSG00000178568 | ERBB4    | -0.06          | 0.04  | 9.32E-02 |                                      |                  |                          |                                 |
| ENSG00000144355 | DLX1     | -0.08          | 0.05  | 1.32E-01 | 4.90E-03                             | whole brain      | AP vs nAP                | Mulligan et al, 2006            |
| ENSG00000151136 | BTBD11   | -0.06          | 0.05  | 1.93E-01 | 2.00E-02                             | Frontal-cortex   | Every other day drinking | Osterndorff-Kahanek et al, 2013 |

ID: Ensembl id of the gene

log2Fold change: log2 value of the fold change calculated using DeSeq2

Column F: Differential expression P value in mouse or rat models

Column G: Region of the mouse/ rat brain used in the study

Column H: Description of the mouse model (e.g. Alcohol preference vs non preference; DID (Drinking in the dark)

Reference: Reference of the study

**Supp table 2b: Differentially expressed hub genes of Brown 4 module in brain of AD subjects**

| id              | gene     | log2FoldChal | lfcSE | pvalue   | Mouse/ Rat brain (Diff expression P) | Region         | Ethanol/ Treatment | Refernce                        |
|-----------------|----------|--------------|-------|----------|--------------------------------------|----------------|--------------------|---------------------------------|
| ENSG00000142089 | IFITM3   | 0.27         | 0.06  | 4.52E-06 | 7.70E-04                             | Frontal-cortex | AP vs nAP          | Osterndorff-Kahanek et al, 2013 |
| ENSG00000147872 | PLIN2    | 0.24         | 0.06  | 3.82E-05 |                                      |                |                    |                                 |
| ENSG00000144908 | ALDH1L1  | 0.22         | 0.06  | 1.52E-04 | 1.90E-02                             | Frontal-cortex | Chronic drinking   | Osterndorff-Kahanek et al, 2013 |
| ENSG00000151929 | BAG3     | 0.21         | 0.06  | 1.60E-04 |                                      |                |                    |                                 |
| ENSG00000148498 | PARD3    | 0.17         | 0.05  | 1.21E-03 |                                      |                |                    |                                 |
| ENSG00000185201 | IFITM2   | 0.17         | 0.06  | 1.90E-03 | 1.20E-03                             | Frontal-cortex | AP vs nAP          | Osterndorff-Kahanek et al, 2013 |
| ENSG00000072952 | MRV1     | 0.17         | 0.06  | 2.30E-03 |                                      |                |                    |                                 |
| ENSG00000067182 | TNFRSF1A | 0.16         | 0.06  | 5.20E-03 |                                      |                |                    |                                 |
| ENSG00000077238 | IL4R     | 0.16         | 0.06  | 6.06E-03 |                                      |                |                    |                                 |
| ENSG00000051620 | HEBP2    | 0.13         | 0.05  | 6.18E-03 |                                      |                |                    |                                 |
| ENSG00000109113 | RAB34    | 0.15         | 0.06  | 6.26E-03 | 7.20E-03                             | Frontal-cortex | AP vs nAP          | Osterndorff-Kahanek et al, 2013 |
| ENSG00000168309 | FAM107A  | 0.15         | 0.05  | 6.71E-03 | 1.60E-03                             | Whole Brain    | AP vs nAP          | Mulligan et al, 2006            |
| ENSG00000145623 | OSMR     | 0.15         | 0.06  | 6.76E-03 | 7.70E-03                             | Whole Brain    | AP vs nAP          | Mulligan et al, 2006            |
| ENSG00000197324 | LRP10    | 0.14         | 0.05  | 7.17E-03 |                                      |                |                    |                                 |
| ENSG00000155366 | RHOC     | 0.14         | 0.05  | 8.35E-03 | 4.50E-05                             | Whole Brain    | AP vs nAP          | Mulligan et al, 2006            |
| ENSG00000187091 | PLCD1    | 0.13         | 0.05  | 9.15E-03 |                                      |                |                    |                                 |
| ENSG00000183255 | PTTG1P   | 0.13         | 0.05  | 1.26E-02 | 4.30E-04                             | Frontal-cortex | AP vs nAP          | Osterndorff-Kahanek et al, 2013 |
| ENSG00000117519 | CNN3     | 0.13         | 0.06  | 1.75E-02 | 1.20E-02                             | Whole Brain    | AP vs nAP          | Kimpel et al, 2007              |
| ENSG00000182541 | LIMK2    | 0.12         | 0.05  | 2.03E-02 |                                      |                |                    |                                 |
| ENSG00000158710 | TAGLN2   | 0.13         | 0.06  | 2.35E-02 | 2.80E-02                             | Frontal-cortex | AP vs nAP          | Ferguson et al, 2017            |
| ENSG00000148175 | STOM     | 0.12         | 0.06  | 2.81E-02 |                                      |                |                    |                                 |
| ENSG00000168610 | STAT3    | 0.10         | 0.05  | 3.34E-02 | 7.00E-04                             | Whole Brain    | AP vs nAP          | Mulligan et al, 2006            |
| ENSG00000135926 | TMBIM1   | 0.12         | 0.06  | 3.75E-02 | 3.00E-03                             | Whole Brain    | AP vs nAP          | Mulligan et al, 2006            |
| ENSG00000131981 | LGALS3   | 0.11         | 0.06  | 6.71E-02 |                                      |                |                    |                                 |
| ENSG00000129116 | PALLD    | 0.08         | 0.05  | 9.48E-02 |                                      |                |                    |                                 |
| ENSG00000198805 | PNP      | 0.10         | 0.06  | 1.01E-01 |                                      |                |                    |                                 |
| ENSG00000181826 | RELL1    | 0.09         | 0.06  | 1.23E-01 | 4.20E-02                             | Frontal-cortex | DID drinking       | Osterndorff-Kahanek et al, 2013 |
| ENSG00000119408 | NEK6     | 0.06         | 0.05  | 1.63E-01 | 1.20E-02                             | Whole Brain    | AP vs nAP          | Mulligan et al, 2006            |
| ENSG00000137693 | YAP1     | 0.07         | 0.05  | 1.73E-01 |                                      |                |                    |                                 |
| ENSG00000031081 | ARHGAP31 | 0.06         | 0.05  | 2.09E-01 |                                      |                |                    |                                 |
| ENSG00000147065 | MSN      | 0.07         | 0.05  | 2.22E-01 | 5.00E-03                             | Whole Brain    | AP vs nAP          | Mulligan et al, 2006            |
| ENSG00000077150 | NFKB2    | 0.07         | 0.06  | 2.27E-01 |                                      |                |                    |                                 |
| ENSG00000162909 | CAPN2    | 0.04         | 0.04  | 2.31E-01 | 1.10E-02                             | Frontal-cortex | AP vs nAP          | Osterndorff-Kahanek et al, 2013 |
| ENSG00000177119 | ANO6     | 0.06         | 0.05  | 2.34E-01 |                                      |                |                    |                                 |
| ENSG00000106565 | TMEM176B | 0.07         | 0.06  | 2.55E-01 | 2.30E-02                             | Frontal-cortex | AP vs nAP          | Osterndorff-Kahanek et al, 2013 |
| ENSG00000213719 | CLIC1    | 0.06         | 0.06  | 2.66E-01 |                                      |                |                    |                                 |
| ENSG00000168994 | PXDC1    | 0.06         | 0.06  | 3.04E-01 |                                      |                |                    |                                 |
| ENSG00000101608 | MYL12A   | 0.04         | 0.05  | 4.93E-01 |                                      |                |                    |                                 |
| ENSG00000124782 | RREB1    | 0.02         | 0.05  | 6.95E-01 | 4.70E-02                             | Frontal-cortex | AP vs nAP          | Osterndorff-Kahanek et al, 2013 |

ID: Ensembl id of the gene

log2Fold change: log2 value of the fold change calculated using DeSeq2

Column F: Differential expression P value in mouse or rat models

Column G: Region of the mouse/ rat brain used in the study

Column H: Description of the mouse model (e.g. Alcohol preference vs non preference; DID (Drinking in the dark)

Reference: Reference of the study
