# Supplementary material for: Analysis of whole genome-transcriptomic organization in brain to identify genes associated with alcoholism
Source: PubMed Central journal article supplement (PMC6376002; doi:10.1038/s41398-019-0384-y), 2019-02-14
Supplement: 41398_2019_384_MOESM4_ESM.pdf [file 41398_2019_384_MOESM4_ESM.pdf]

**A**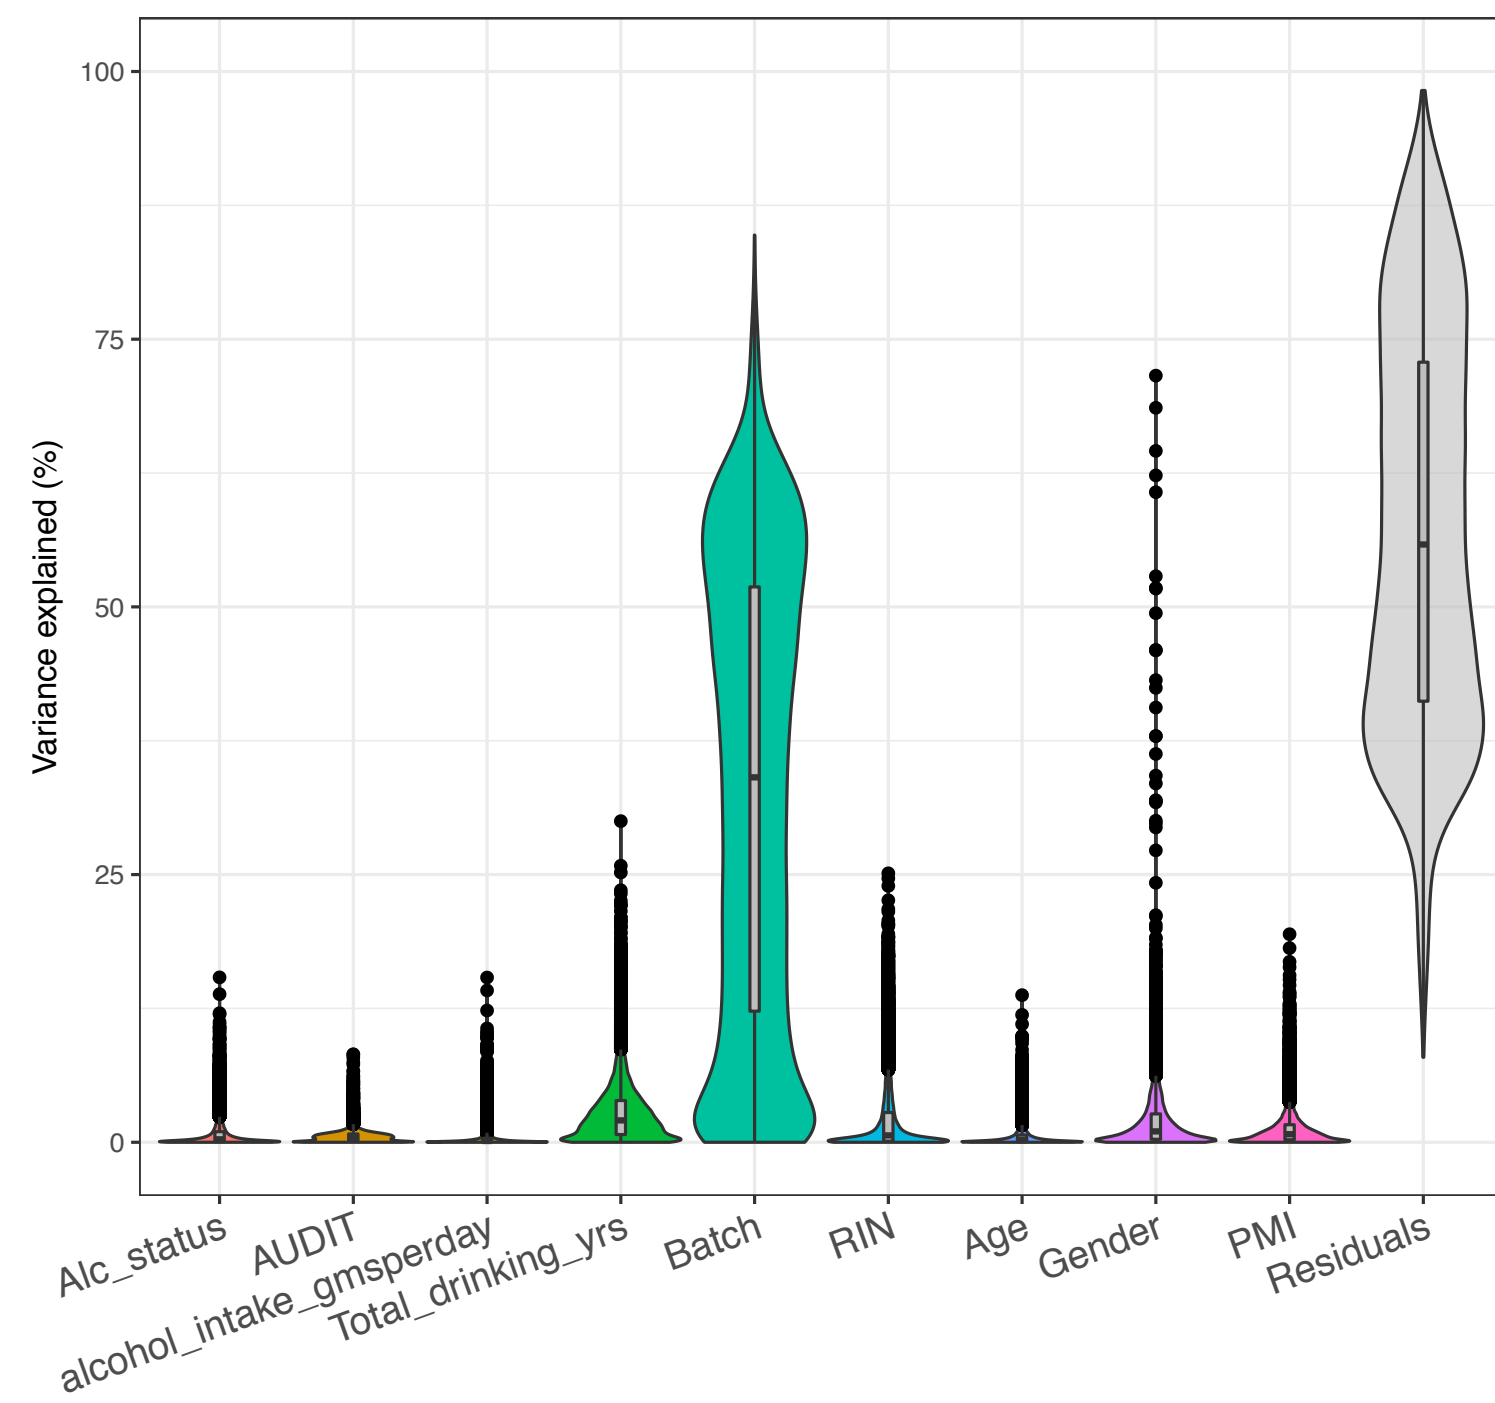**B**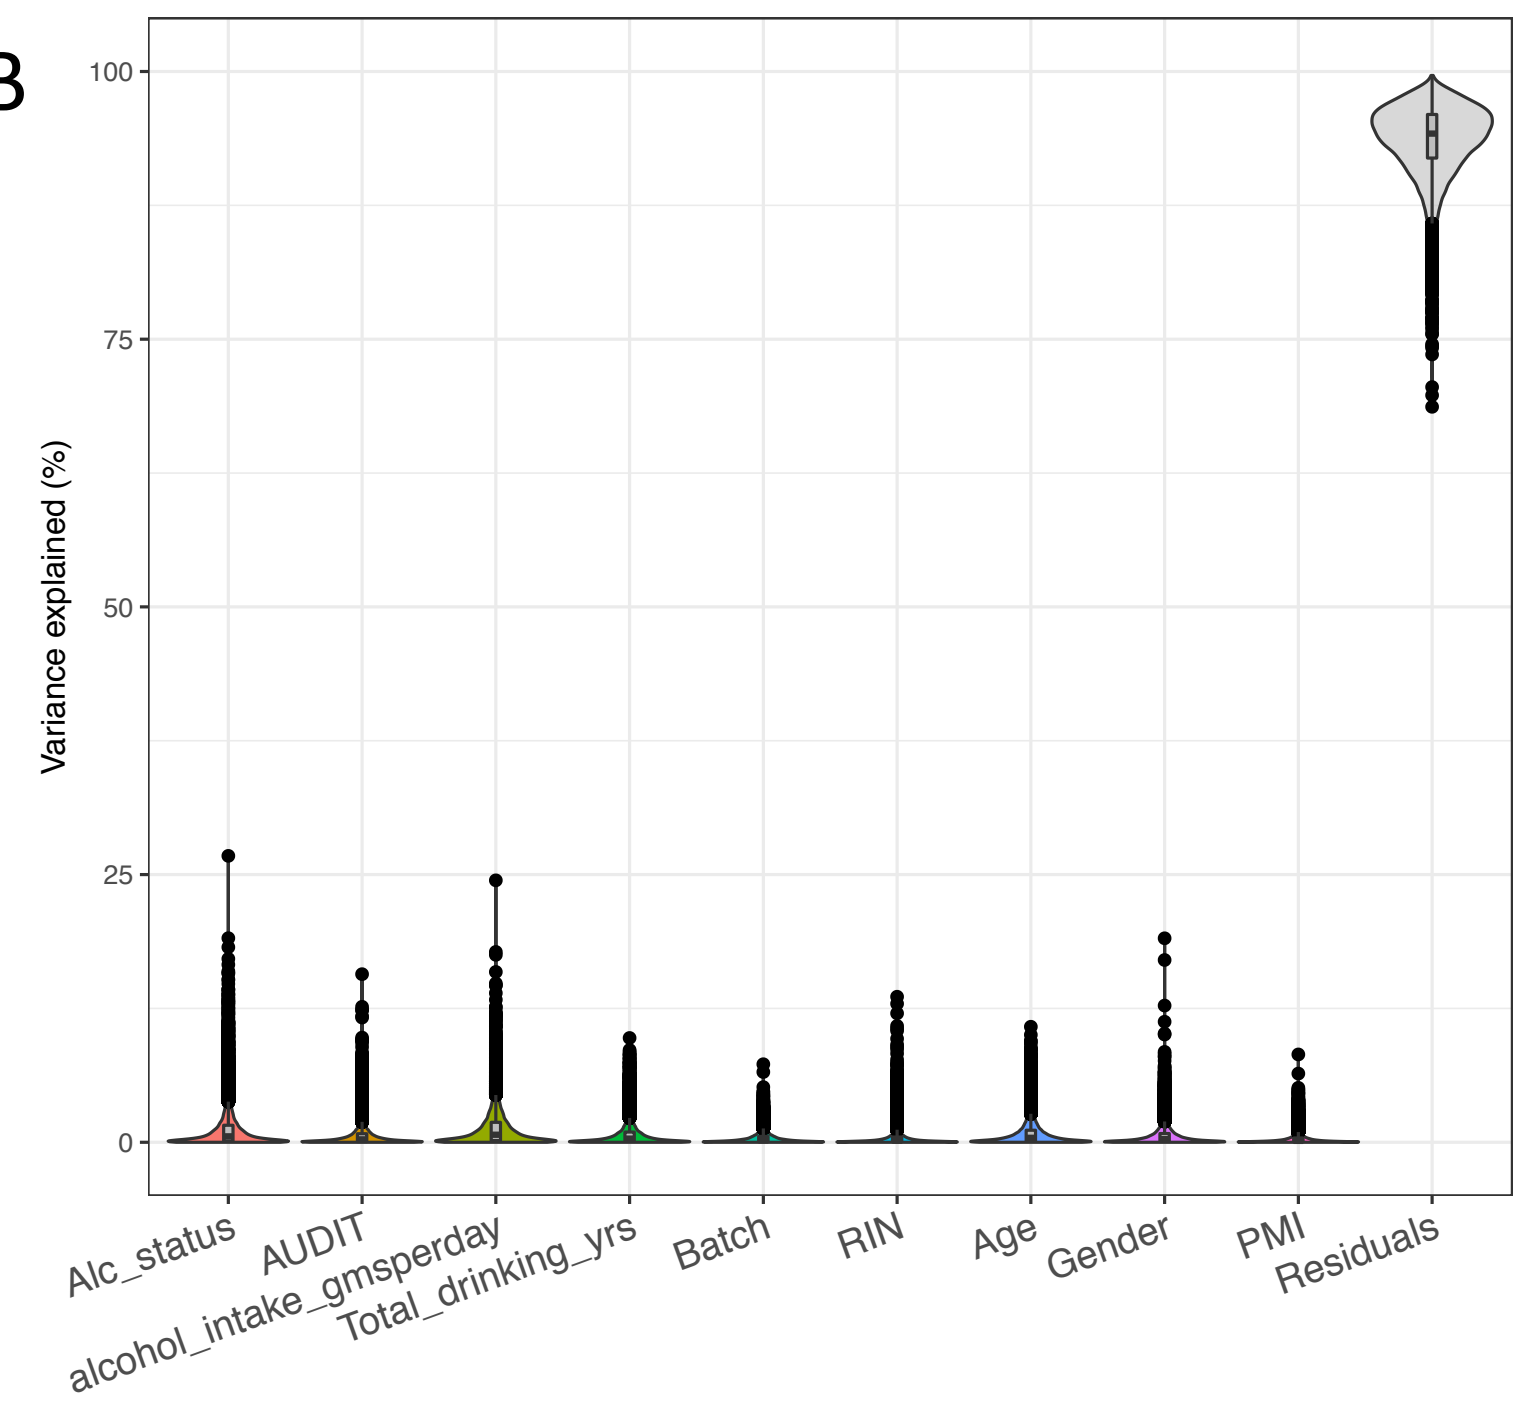

Supplementary figure 1: Violin plots depicting drivers of variation in gene expression. X-axis shows various traits/ confounders and y-axis shows the percentage of variance explained. Thickness of each violin bar depicts the proportion of genes corresponding to level of y-axis. (A) Sequencing batch was the major driver of variation in gene expression. (B) The variation partition plot after correction for batch, RIN, age, gender and PMI.
