# Supplementary material for: Analysis of whole genome-transcriptomic organization in brain to identify genes associated with alcoholism
Source: PubMed Central journal article supplement (PMC6376002; doi:10.1038/s41398-019-0384-y), 2019-02-14
Supplement: 41398_2019_384_MOESM6_ESM.pdf [file 41398_2019_384_MOESM6_ESM.pdf]

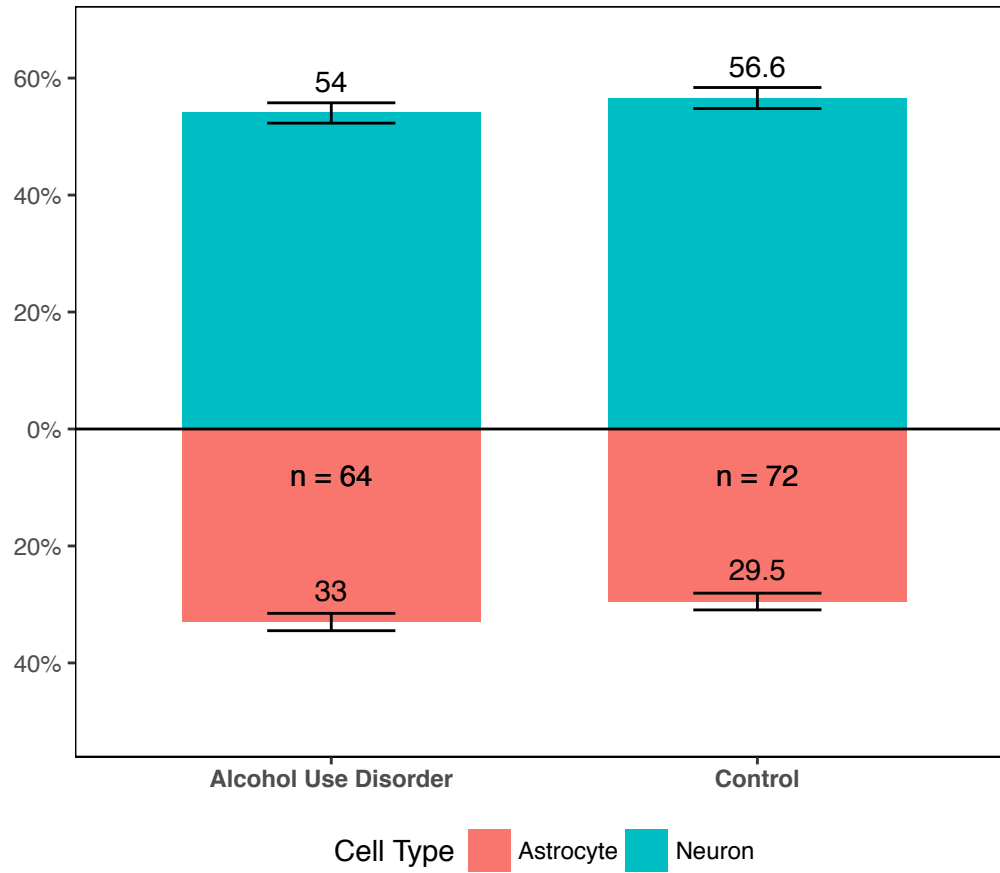

Supplementary Figure 3: Deconvolution of cell types in alcoholics and controls.
